# Supplementary material
Source: publisher figshare collection journal article supplement (https://springernature.figshare.com/ndownloader/files/24107991)

20110604

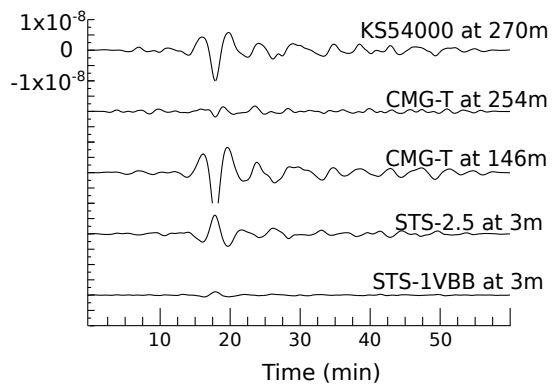

20110926

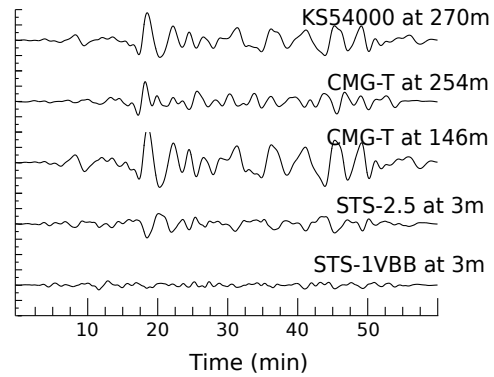

20111024

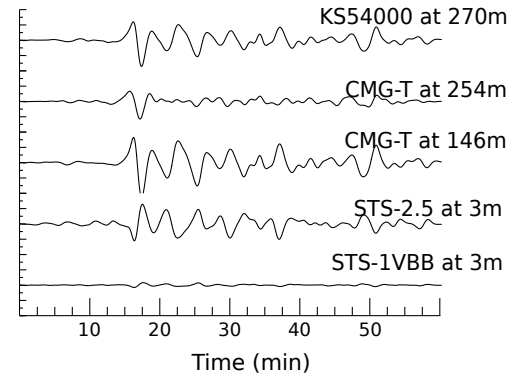

20120124

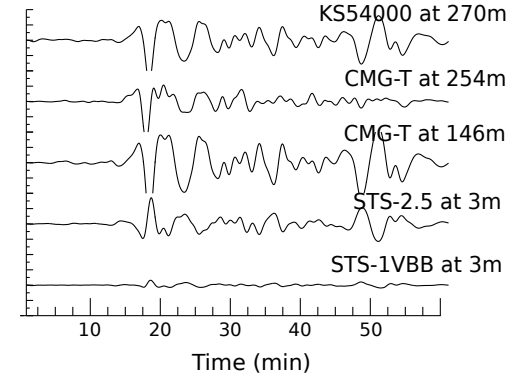

20140227

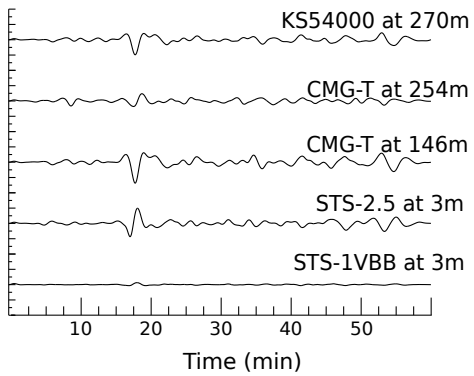

20140912

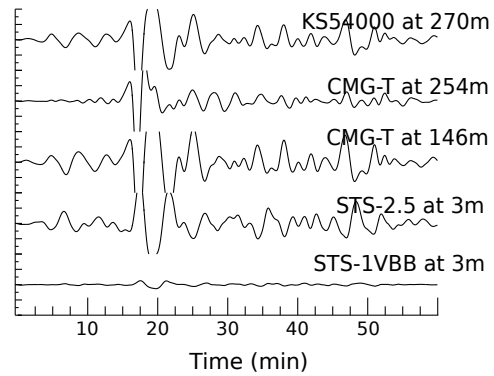

20141223

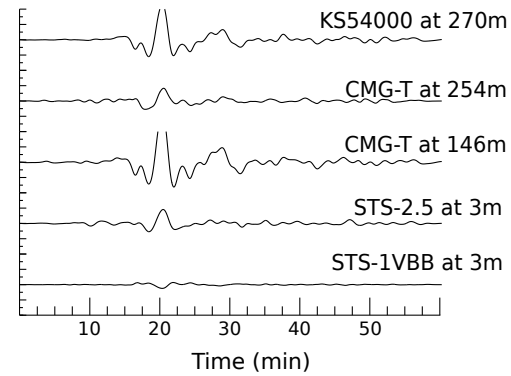

20150317

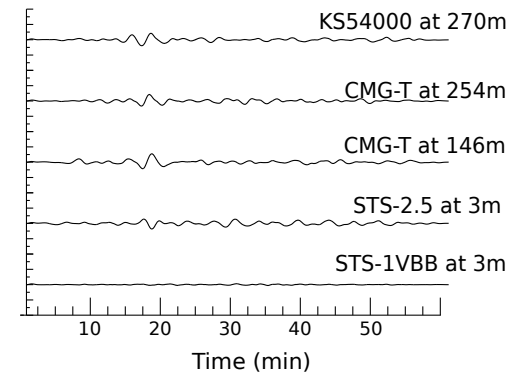

20150621

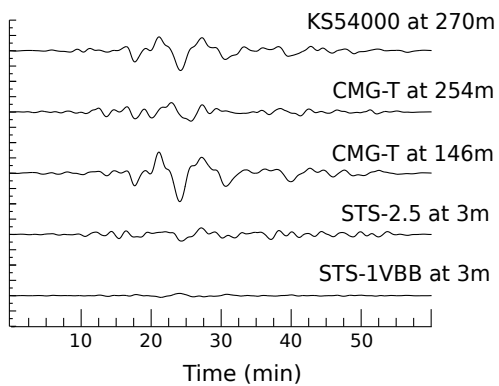

20150622

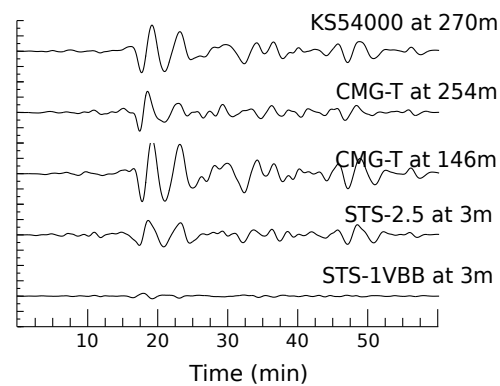

20170907

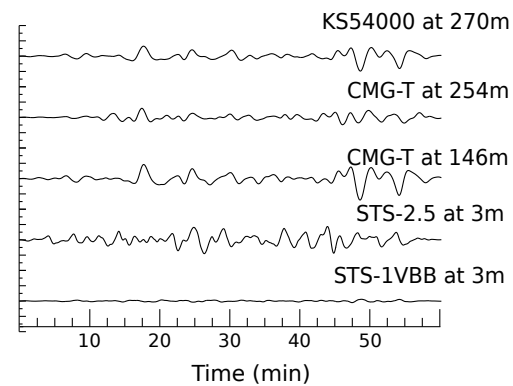

20180309

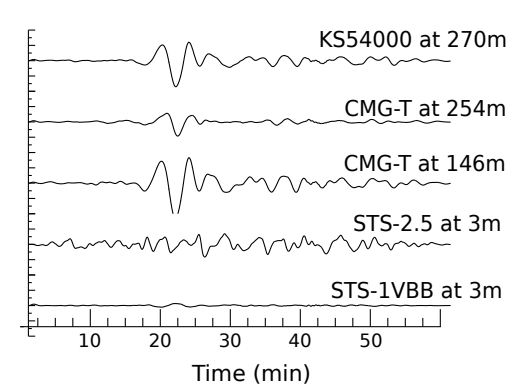

Supplement: Supplementary file 1 [file 24107991]
